# Supplementary material for: Structural insights on TRPV5 gating by endogenous modulators
Source: PubMed Central journal article supplement (PMC6179994; doi:10.1038/s41467-018-06753-6), 2018-10-10
Supplement: 41467_2018_6753_MOESM3_ESM.pdf [file 41467_2018_6753_MOESM3_ESM.pdf]

## Description of Additional Supplementary Files

File Name: Supplementary Movie 1

Description: TRPV5 activation by PI(4,5)P<sub>2</sub>. Morph between lipid-bound TRPV5 and PI(4,5)P<sub>2</sub>- bound TRPV5 models, depicted as cartoons. Zoomed out view shows Trp583 as sticks. Zoomed in view shows Arg302, Lys484, Trp583, Arg 584, Gln587, Glu588 and PI(4,5)P<sub>2</sub> as sticks
